# Supplementary material
Source: PubMed Central journal article supplement (PMC5679748)
Supplement: NIHMS903786-supplement-1.pdf [file NIHMS903786-supplement-1.pdf]

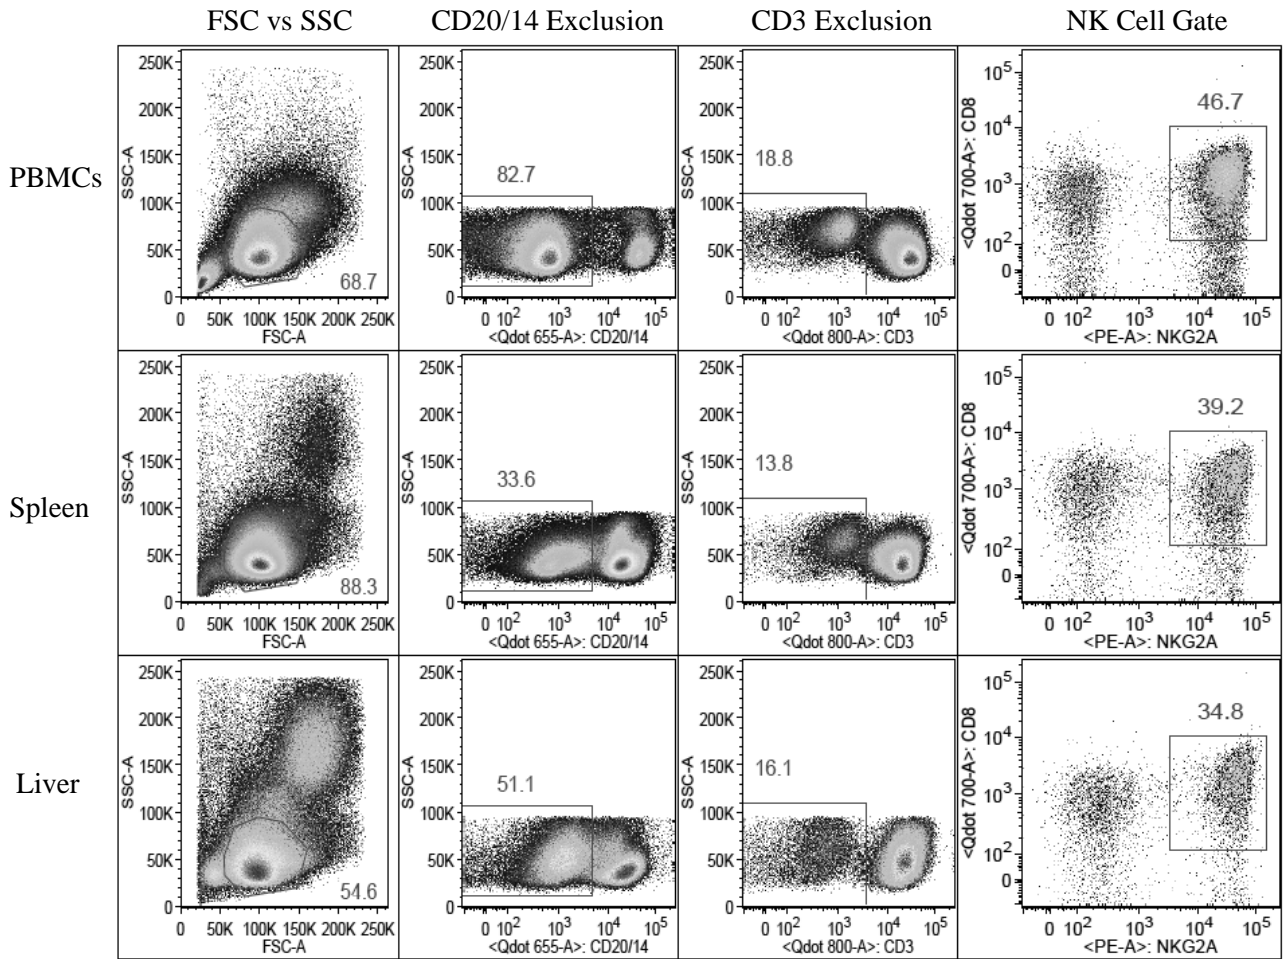

Supplementary Fig. 1.- Gating strategy used to identify NK cells in PBMCs, Spleen and Liver. Single-cell suspensions were stained with fluorochrome-conjugated monoclonal antibodies and NK cells were identified as live CD20<sup>-</sup>CD14<sup>-</sup>CD3<sup>-</sup>CD8<sup>+</sup>NKG2A<sup>+</sup> lymphocytes.

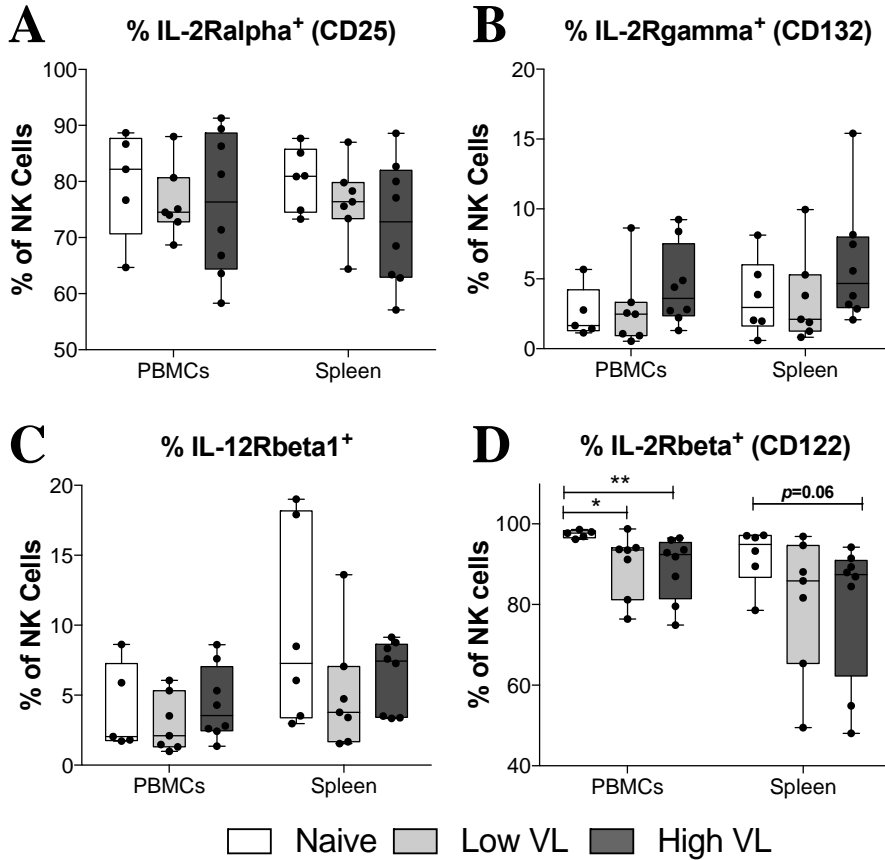

Supplementary Fig. 2.- Expression of CD25 (A), CD132 (B), IL-12R $\beta$ 1 (C) and CD122 (D) in NK cells from PBMCs and spleen single-cell suspensions that were viably frozen. Data are shown as minimum to maximum floating bars with a horizontal line representing the mean. \*,  $p < 0.05$  and \*\*,  $p < 0.01$  indicate statistically significant differences by Mann-Whitney  $t$  test.
